# Supplementary material
Source: PubMed Central journal article supplement (PMC1389829)
Supplement: cmaj_174_5_649__1.pdf [file cmaj_174_5_649__1.pdf]

**Appendix 1: Laboratory investigations during and after hepatitis C antiviral therapy**

| Test                                                                                                       | Comments                                                                                                                                                                                                                                                                                                                                                                                                                                                                                                                                                                                                                                                                                                                                                                                                                                                                                                                                                  |
|------------------------------------------------------------------------------------------------------------|-----------------------------------------------------------------------------------------------------------------------------------------------------------------------------------------------------------------------------------------------------------------------------------------------------------------------------------------------------------------------------------------------------------------------------------------------------------------------------------------------------------------------------------------------------------------------------------------------------------------------------------------------------------------------------------------------------------------------------------------------------------------------------------------------------------------------------------------------------------------------------------------------------------------------------------------------------------|
| <b>During therapy</b>                                                                                      |                                                                                                                                                                                                                                                                                                                                                                                                                                                                                                                                                                                                                                                                                                                                                                                                                                                                                                                                                           |
| Complete blood count every 2 wk for 2 mo, then every month until the end of the treatment course           | Neutrophil count $< 0.75 \times 10^9/L$ : reduce interferon dose<br>Neutrophil count $< 0.5 \times 10^9/L$ : STOP interferon<br>Platelet count $< 50 \times 10^9/L$ : reduce interferon dose<br>Platelet count $< 25 \times 10^9/L$ : STOP interferon<br>Hemoglobin level $< 100$ g/L: reduce ribavirin dose plus consider erythropoietin.<br>Hemoglobin level $< 85$ g/L: STOP interferon-ribavirin<br>Also discontinue ribavirin in a patient with a history of cardiovascular disease and a $> 20$ g/L drop over 1 mo; in a patient with stable cardiovascular disease and a $> 20$ g/L drop over 1 mo, reduce interferon-ribavirin dose (if the hemoglobin level still $< 100$ g/L after 4 wk of dose reduction, then STOP interferon-ribavirin)<br>Creatinine level $> 2 \times$ upper limit of normal: STOP interferon-ribavirin<br>If the patient becomes hypo- or hyperthyroid, thyroid therapy needs to be started to maintain a euthyroid state |
| Alanine transferase, bilirubin and glucose levels every month until the end of the treatment course        | Alanine transferase level $> 10 \times$ upper limit of normal: STOP interferon-ribavirin                                                                                                                                                                                                                                                                                                                                                                                                                                                                                                                                                                                                                                                                                                                                                                                                                                                                  |
| Thyroid-stimulating hormone level every 6 mo during treatment and again at 6 mo after the end of treatment | —                                                                                                                                                                                                                                                                                                                                                                                                                                                                                                                                                                                                                                                                                                                                                                                                                                                                                                                                                         |
| Pregnancy test every month when appropriate                                                                | —                                                                                                                                                                                                                                                                                                                                                                                                                                                                                                                                                                                                                                                                                                                                                                                                                                                                                                                                                         |
| <b>After therapy</b>                                                                                       |                                                                                                                                                                                                                                                                                                                                                                                                                                                                                                                                                                                                                                                                                                                                                                                                                                                                                                                                                           |
| Qualitative HCV RNA PCR assay at the end of treatment course                                               | —                                                                                                                                                                                                                                                                                                                                                                                                                                                                                                                                                                                                                                                                                                                                                                                                                                                                                                                                                         |
| Qualitative HCV RNA PCR assay 6 mo after the end of treatment course                                       | —                                                                                                                                                                                                                                                                                                                                                                                                                                                                                                                                                                                                                                                                                                                                                                                                                                                                                                                                                         |
| Thyroid-stimulating hormone level at 6 mo after the end of treatment                                       | —                                                                                                                                                                                                                                                                                                                                                                                                                                                                                                                                                                                                                                                                                                                                                                                                                                                                                                                                                         |
| Pregnancy test every month when appropriate for 6 mo after treatment                                       | —                                                                                                                                                                                                                                                                                                                                                                                                                                                                                                                                                                                                                                                                                                                                                                                                                                                                                                                                                         |
